# Supplementary material for: Effect of high bismuth deficiency on structure and oxide ion conductivity of a Bi0.55MoO4 single crystal
Source: Royal Society of Chemistry journal article supplement (doi:10.1039/c5ce01765c), 2015-01-01
Supplement: c5ce01765c1.pdf [file c5ce01765c1.pdf]

## Supporting Information

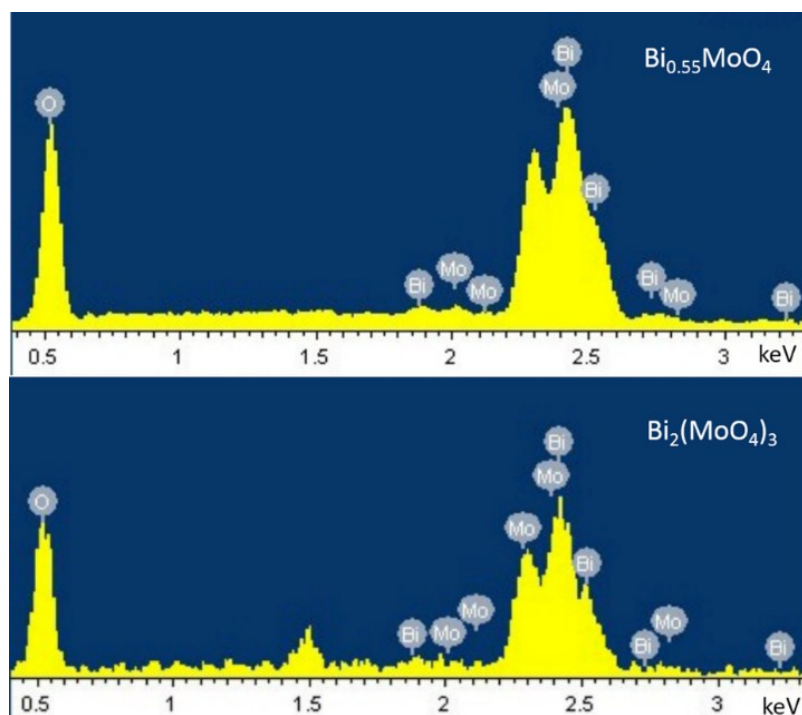

**Fig. S1** EDS spectra of (top)  $\text{Bi}_{0.55}\text{MoO}_4$  and (bottom)  $\text{Bi}_2(\text{MoO}_4)_3$ .

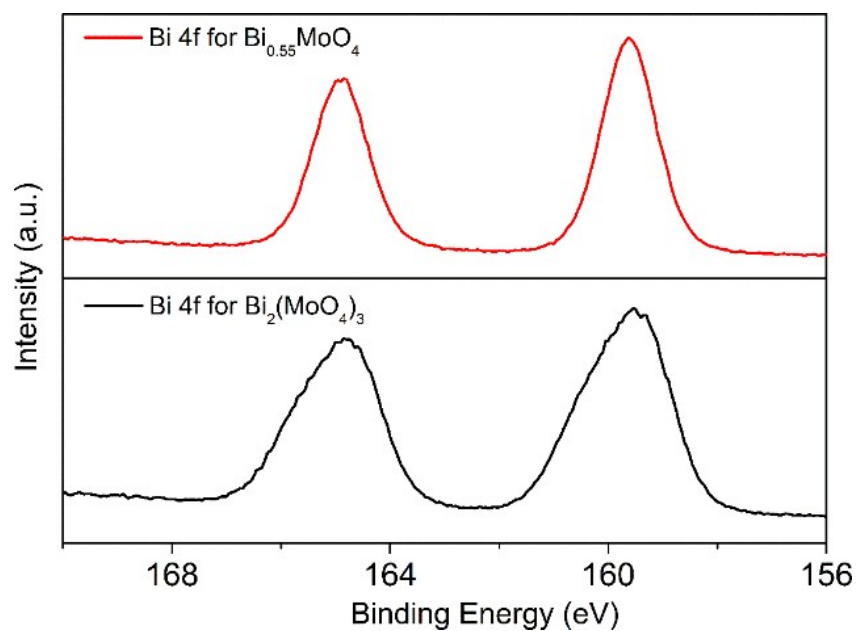

**Fig. S2** Bi 4f XPS spectra of  $\text{Bi}_{0.55}\text{MoO}_4$  and  $\text{Bi}_2(\text{MoO}_4)_3$ .

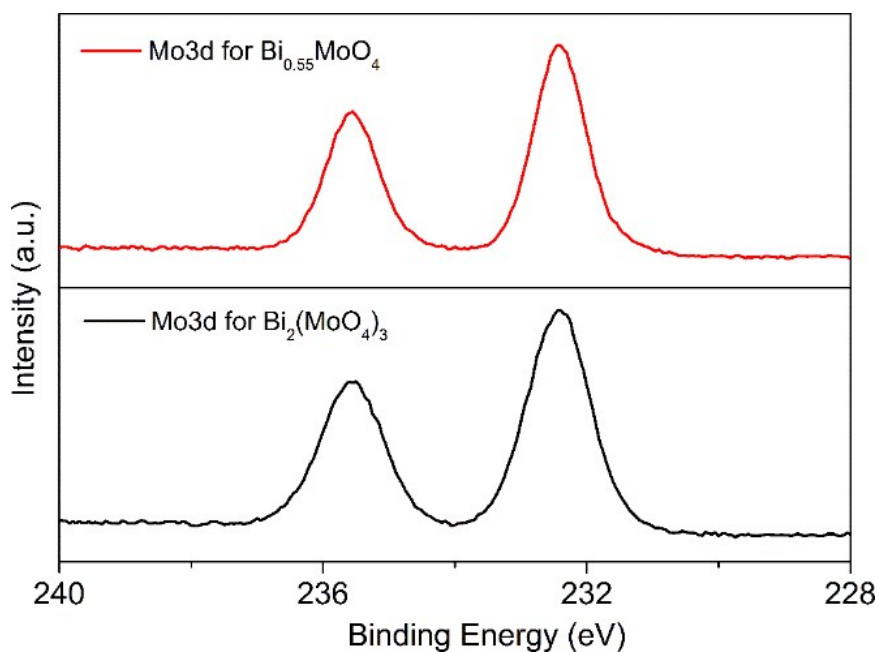

**Fig. S3** Mo 3d XPS spectra of  $\text{Bi}_{0.55}\text{MoO}_4$  and  $\text{Bi}_2(\text{MoO}_4)_3$ .

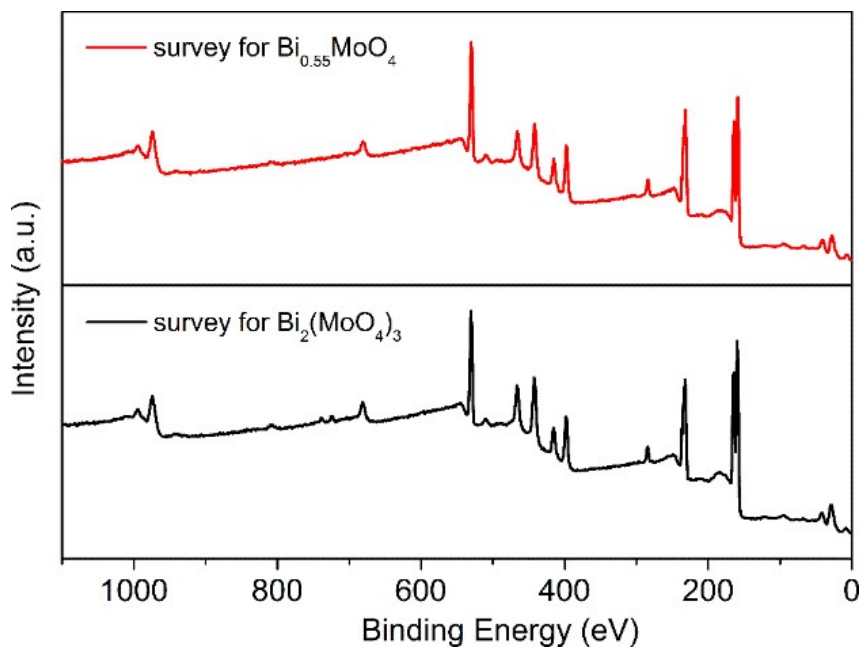

**Fig. S4** XPS survey spectra of  $\text{Bi}_{0.55}\text{MoO}_4$  and  $\text{Bi}_2(\text{MoO}_4)_3$ .

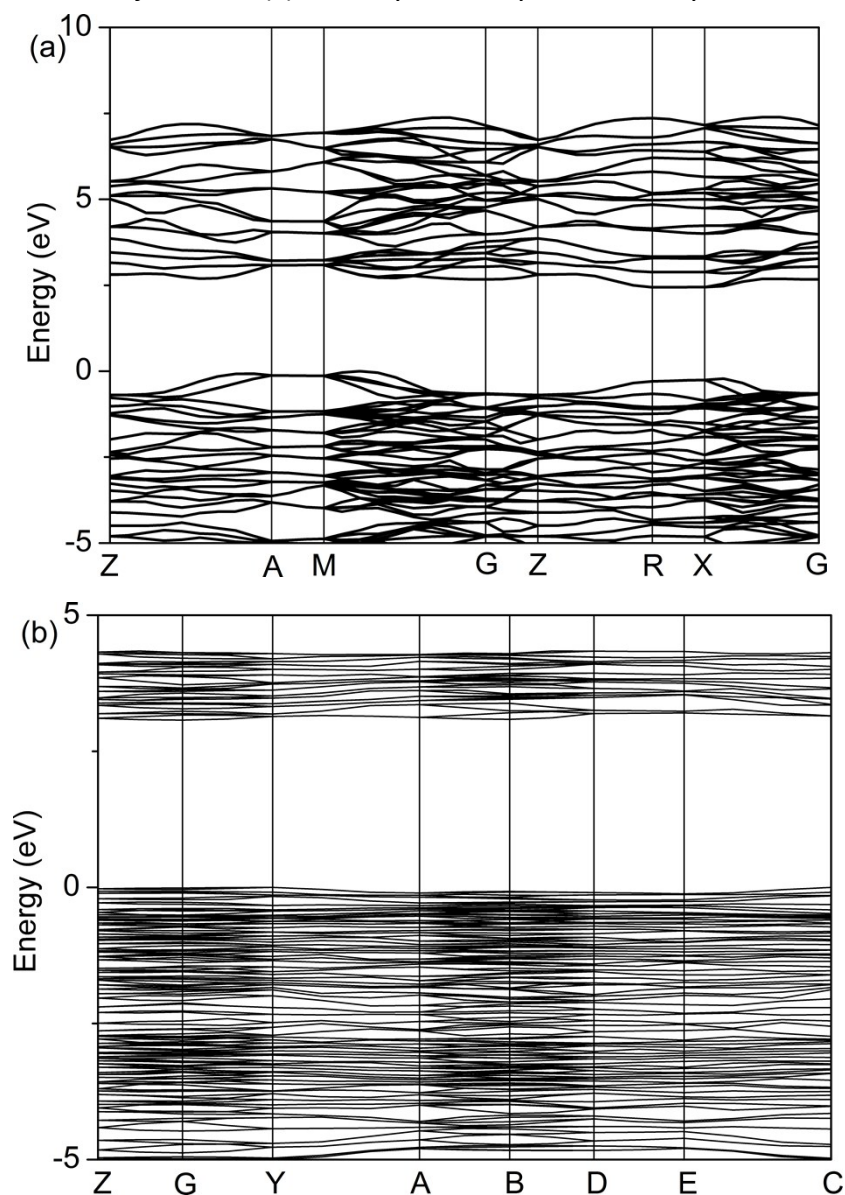

**Fig. S5** The band structures of (a)  $\text{Bi}_{0.55}\text{MoO}_4$  and (b)  $\text{Bi}_2(\text{MoO}_4)_3$  along high symmetry points in the first Brillouin zone.

**Table S1** The atomic coordinates and their equivalent isotropic thermal parameters for  $\text{Bi}_{0.55}\text{MoO}_4$

|     | x       | y       | z       | $U_{\text{eq}}(\text{\AA}^2)$ | Site |
|-----|---------|---------|---------|-------------------------------|------|
| Bi1 | 0.50000 | 0.25000 | 0.87500 | 0.015                         | 4b   |
| Mo1 | 0.00000 | 0.75000 | 0.87500 | 0.012                         | 4a   |
| O1  | 0.24150 | 0.59880 | 0.95810 | 0.023                         | 16f  |

**Table S2** The atomic coordinates and their equivalent isotropic thermal parameters for  $\text{Bi}_2(\text{MoO}_4)_3$

|     | x       | y       | z       | $U_{\text{eq}}(\text{\AA}^2)$ | Site |
|-----|---------|---------|---------|-------------------------------|------|
| Bi1 | 0.99586 | 0.36209 | 0.75579 | 0.014                         | 4e   |

|     |         |         |         |       |    |
|-----|---------|---------|---------|-------|----|
| Bi2 | 0.67580 | 0.37011 | 0.08372 | 0.015 | 4e |
| Mo2 | 0.68741 | 0.15135 | 0.60944 | 0.014 | 4e |
| Mo1 | 0.88419 | 0.38886 | 0.41660 | 0.014 | 4e |
| Mo3 | 0.46143 | 0.36686 | 0.69562 | 0.015 | 4e |
| O1  | 0.69260 | 0.31550 | 0.69830 | 0.020 | 4e |
| O2  | 0.24450 | 0.29080 | 0.69790 | 0.016 | 4e |
| O3  | 0.71170 | 0.30050 | 0.43450 | 0.020 | 4e |
| O4  | 0.93420 | 0.19580 | 0.65260 | 0.016 | 4e |
| O5  | 0.67960 | 0.05260 | 0.72270 | 0.022 | 4e |
| O6  | 0.95580 | 0.44920 | 0.58110 | 0.015 | 4e |
| O7  | 0.81960 | 0.44650 | 0.25610 | 0.016 | 4e |
| O8  | 1.05390 | 0.29210 | 0.41310 | 0.021 | 4e |
| O9  | 0.49610 | 0.44070 | 0.83470 | 0.022 | 4e |
| O10 | 0.45050 | 0.20610 | 0.57230 | 0.021 | 4e |
| O11 | 0.69350 | 0.06380 | 0.48110 | 0.021 | 4e |
| O12 | 0.39350 | 0.46900 | 0.58490 | 0.026 | 4e |

**Table S3** Interatomic distances (Å) in Bi<sub>0.55</sub>MoO<sub>4</sub>

|        |          |        |          |        |          |
|--------|----------|--------|----------|--------|----------|
| Bi1-O1 | 2.469(3) | Bi1-O1 | 2.487(3) | Mo1-O1 | 1.776(3) |
| Bi1-O1 | 2.469(3) | Bi1-O1 | 2.487(3) | Mo1-O1 | 1.776(3) |
| Bi1-O1 | 2.469(3) | Bi1-O1 | 2.487(3) | Mo1-O1 | 1.776(3) |
| Bi1-O1 | 2.469(3) | Bi1-O1 | 2.487(3) | Mo1-O1 | 1.776(3) |

**Table S4** Interatomic distances (Å) in Bi<sub>2</sub>(MoO<sub>4</sub>)<sub>3</sub>

|        |          |         |          |         |          |         |          |
|--------|----------|---------|----------|---------|----------|---------|----------|
| Bi1-O6 | 2.145(4) | Bi1-O5  | 2.617(4) | Bi2-O7  | 2.167(4) | Bi2-O11 | 2.616(4) |
| Bi1-O4 | 2.226(4) | Bi1-O7  | 2.643(4) | Bi2-O2  | 2.240(4) | Bi2-O8  | 2.673(4) |
| Bi1-O2 | 2.311(4) | Bi1-O11 | 2.751(4) | Bi2-O4  | 2.302(4) | Bi2-O10 | 2.324(4) |
| Bi1-O1 | 2.341(4) | Bi1-O7  | 2.167(4) | Bi2-O10 | 2.324(4) | Bi2-O11 | 2.616(4) |
| Mo1-O3 | 1.732(4) | Mo2-O5  | 1.707(4) | Mo3-O12 | 1.696(5) |         |          |
| Mo1-O8 | 1.726(4) | Mo2-O11 | 1.756(4) | Mo3-O9  | 1.730(4) |         |          |
| Mo1-O7 | 1.861(4) | Mo2-O10 | 1.886(4) | Mo3-O1  | 1.873(4) |         |          |
| Mo1-O6 | 1.915(4) | Mo2-O4  | 1.922(4) | Mo3-O2  | 1.894(4) |         |          |
| Mo1-O6 | 2.233(4) | Mo2-O1  | 2.128(4) | Mo3-O10 | 2.293(5) |         |          |
